# Supplementary material
Source: HighWire-hosted journal article supplement (https://bjo.bmj.com/content/suppl/2006/04/10/90.4.442)

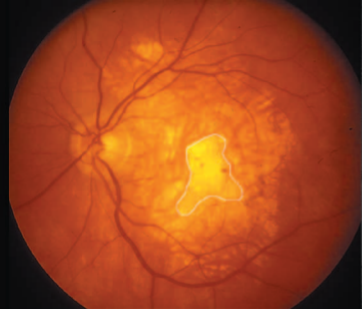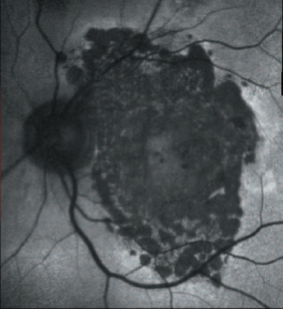

bj83022.f6

Supplement: 904442f6.pdf [file 904442f6.pdf]
